# Supplementary material for: Adjudicating between face-coding models with individual-face fMRI responses
Source: PubMed Central journal article supplement (PMC5550004; doi:10.1371/journal.pcbi.1005604), 2017-07-26

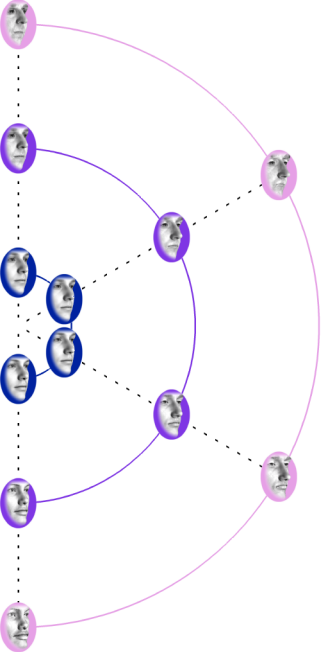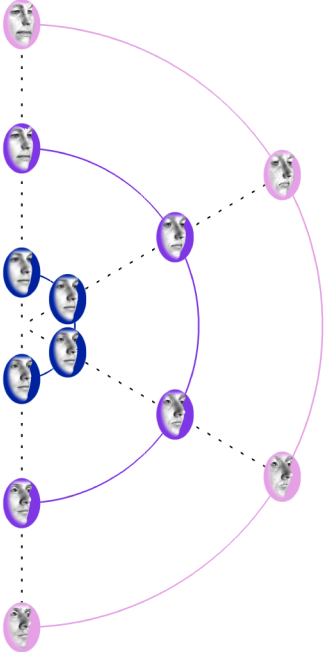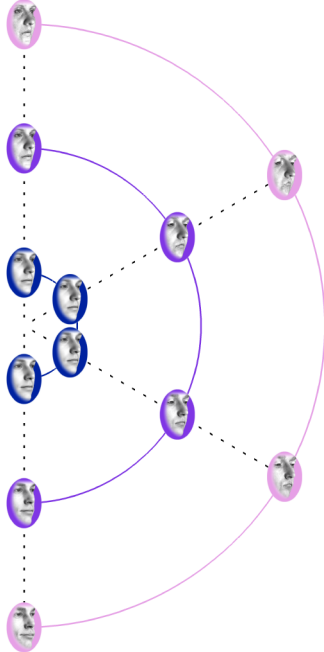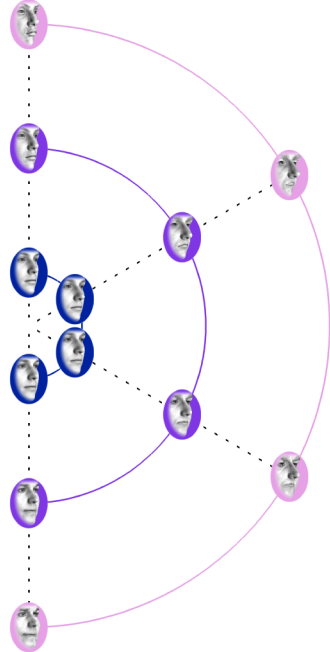

Supplement: pcbi.1005604.s001.pdf [file pcbi.1005604.s001.pdf]
